# Supplementary material for: A Hawaiian Tropical Dry Forest Regenerates: Natural Regeneration of Endangered Species under Biocultural Restoration
Source: MDPI journal article supplement (doi:10.3390/su14031159), 2022-01-20
Supplement: s1 [file s1]

Archive with 1 entries (1 files):
- sustainability-1500511-supplementary.pdf
