# Supplementary material for: A Hawaiian Tropical Dry Forest Regenerates: Natural Regeneration of Endangered Species under Biocultural Restoration
Source: MDPI journal article supplement (doi:10.3390/su14031159), 2022-01-20

**Table S1**

a) Results of negative binomial glmm to test the effect of annual rainfall on number of new recruits observed per year. Species is a random factor in the model.

|           | <b>Estimate</b> | <b>SE</b> | <b>T value</b> | <b>P value</b> |
|-----------|-----------------|-----------|----------------|----------------|
| Intercept | 0.44            | 0.92      | 0.48           | 0.63           |
| Rainfall  | 0.02            | 0.01      | 1.96           | 0.05           |

b) Results of binomial glmm to test the effect of annual rainfall on survival of naturally recruited individuals. Seedling height (log, cm) is a covariable and species is a random factor in the model.

|                 | <b>Estimate</b> | <b>SE</b> | <b>T value</b> | <b>P value</b> |
|-----------------|-----------------|-----------|----------------|----------------|
| Intercept       | 1.33            | 0.81      | 1.65           | 0.1            |
| Height          | 0.05            | 0.01      | 4.01           | <0.001         |
| Rainfall        | -0.01           | 0.01      | -1.79          | 0.07           |
| Height*Rainfall | -0.0004         | 0.0001    | -3.07          | 0.002          |

c) Results of glm to test the effect of annual rainfall on height (log, cm) of naturally recruited individuals. Initial height (at t-1 year) (log) is a covariable and individual/species is a random factor in the model.

|           | <b>Estimate</b> | <b>SE</b> | <b>T value</b> | <b>P value</b> |
|-----------|-----------------|-----------|----------------|----------------|
| Intercept | 1.37            | 0.19      | 7.22           | <0.001         |
| Height    | 0.7             | 0.03      | 23.9           | <0.001         |
| Rainfall  | -0.004          | 0.002     | 2.66           | 0.007          |

**Figure S1.** Annual survival of naturally recruited individuals, by species. Only species for which there were >10 individuals at each census are included.

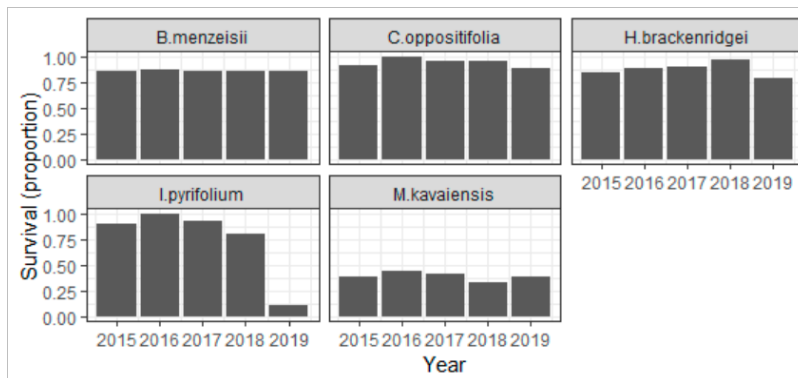

Supplement: s1 [file s1 › sustainability-1500511-supplementary.pdf]
